# Supplementary material for: Dual-responsive Gemini Micelles for Efficient Delivery of Anticancer Therapeutics
Source: MDPI journal article supplement (doi:10.3390/polym11040604), 2019-04-02

## Supporting information

### Dual-responsive gemini micelles for efficient delivery of anti-cancer therapeutics

Young In Choi,<sup>a,†</sup> Eun-sook Choi,<sup>a,†</sup> Kwan Ho Mun,<sup>b</sup> Se Guen Lee,<sup>a</sup> Sung Jun Lee,<sup>a</sup>

Sang Won Jeong,<sup>a</sup> Eunjoo Kim,<sup>a</sup> Seung Woo Lee,<sup>b,\*</sup> and Hyun-Chul Kim <sup>a,\*</sup>

<sup>a</sup> *Convergence Research Institute, Daegu Gyeongbuk Institute of Science and Technology (DGIST), Daegu 42988, Republic of Korea.*

<sup>b</sup> *School of Chemical Engineering, Yeungnam University, Gyeongsan 38541, Republic of Korea*

Figure S1. Fluorescence spectra with DOX concentrations in DMF (A) and calibration curve obtained from standard DOX solutions (B).

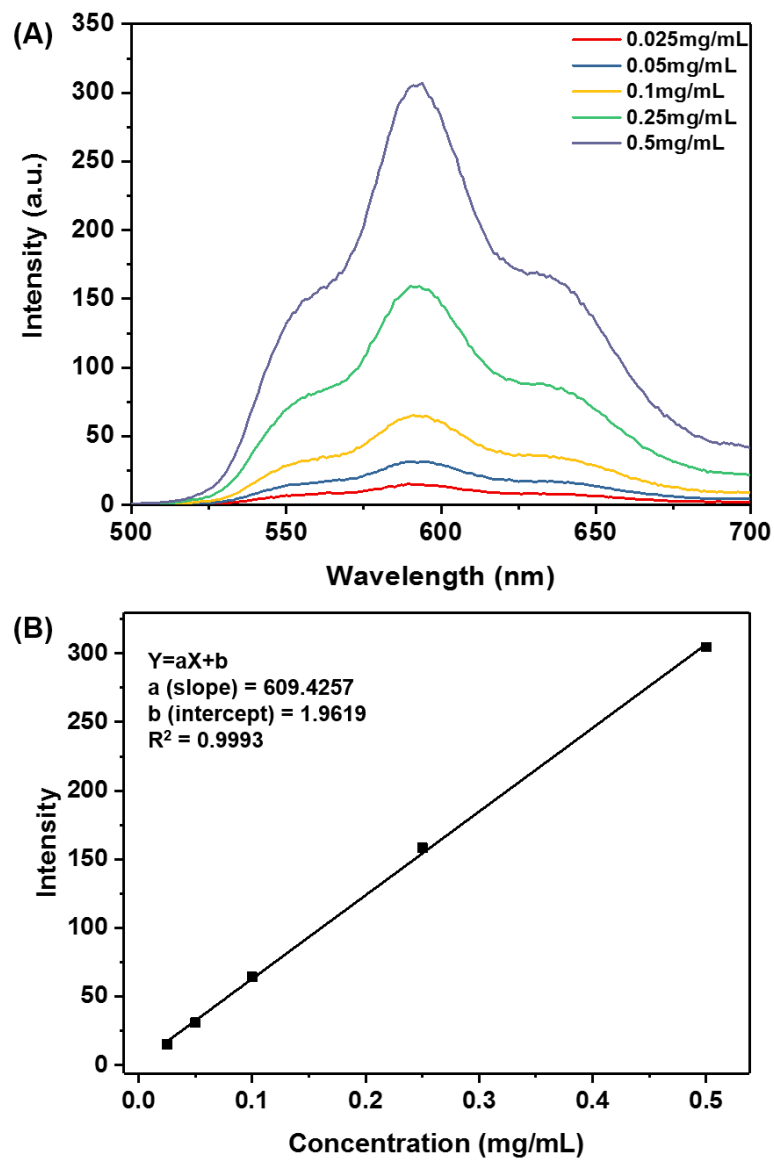

Figure S2. GPC traces of monomeric mPEG-Cys-PMT and gemini mPEG-Cys-PMT measured by using THF as a mobile phase.

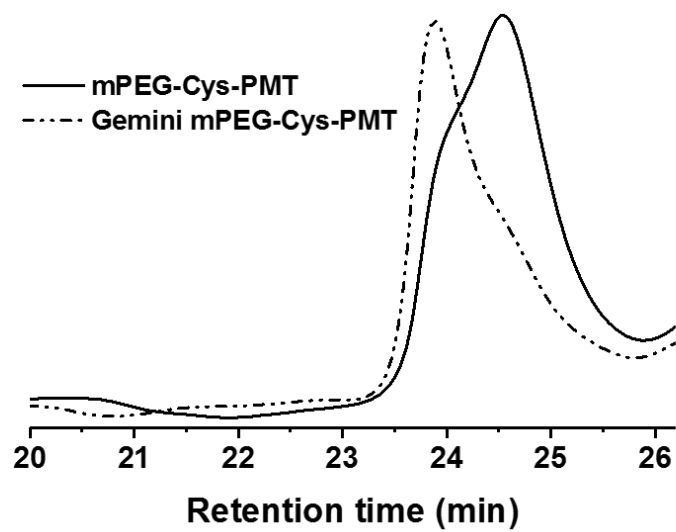

Figure S3. Plot of the intensity ratio  $I_{337}/I_{333}$  from the pyrene excitation spectra versus the logarithm of (A) monomeric mPEG-Cys-PMT and (B) gemini mPEG-Cys-PMT treated with 10 mM DTT.

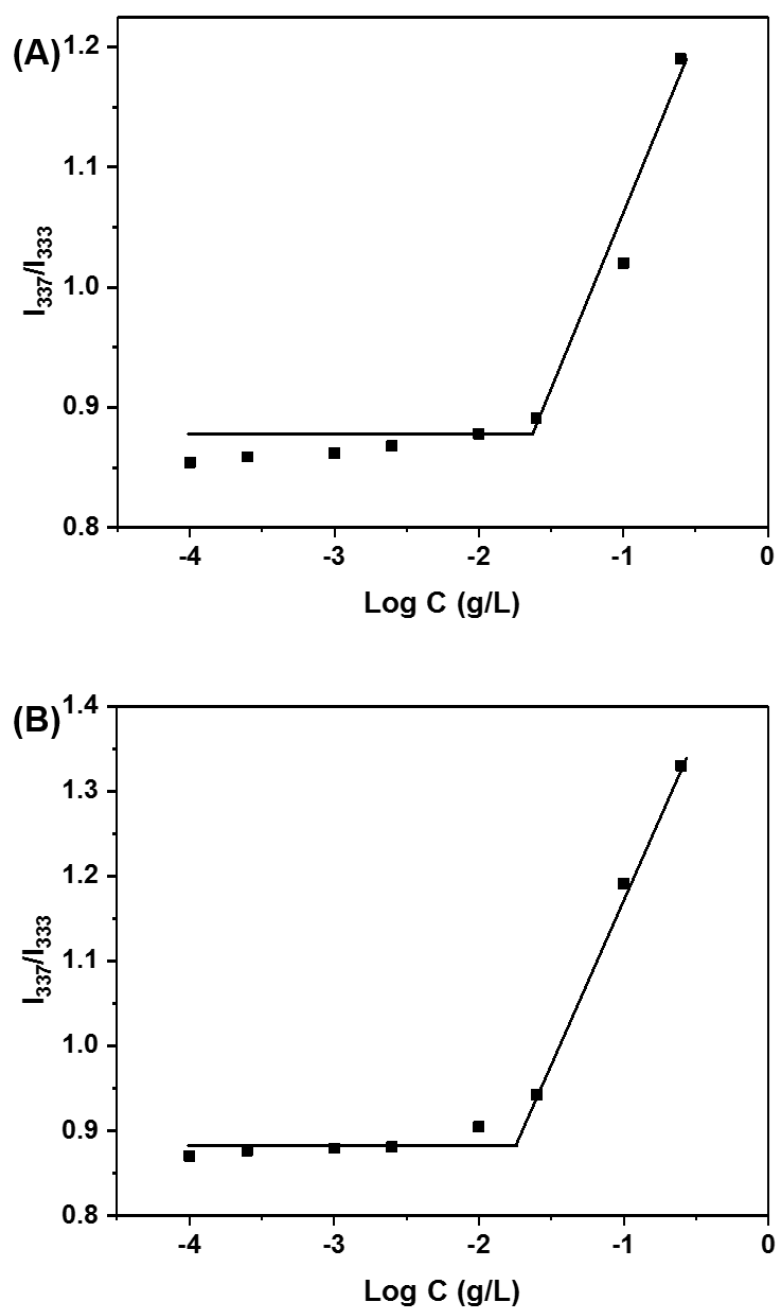

Figure S4. Drug loading contents and efficiency of gemini mPEG-Cys-PMT micelles with feed weight ratios of polymer and DOX.

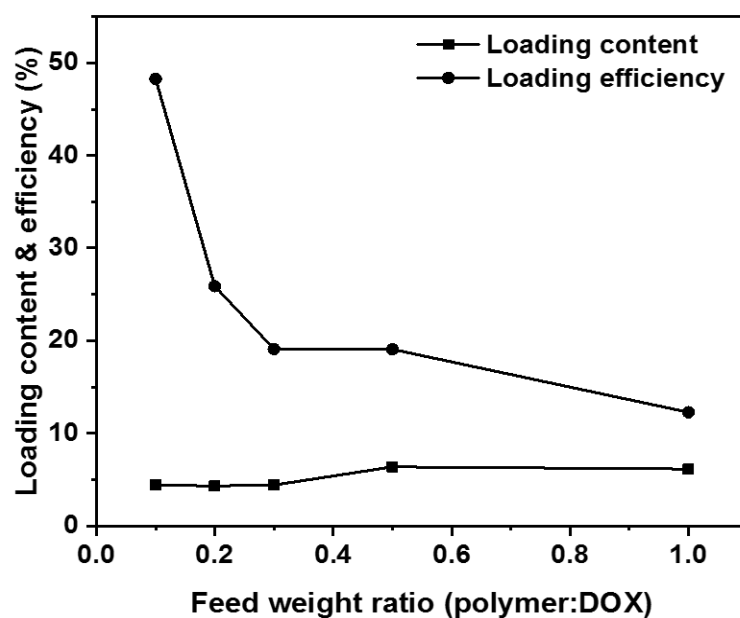

Supplement: s1 [file s1]
